# Supplementary material for: Precision genome engineering with programmable DNA-nicking enzymes
Source: HighWire-hosted journal article supplement (doi:10.1101/gr.138792.112), 2012-04-20
Supplement: SuppFigsTables.docx [file SuppFigsTables.docx]

**Supplemental Figure 1. DNA sequences of PCR products from modified genome.**

**WT**

TGCTGgtcatcctcatcCTGATaaactgcaaaagGCTGA

**Donor**

TGCTGgtcatcctcatcCTGATTCTAGACTGATaaactgcaaaagGCTGA

**Nickase(HR)**

TGCTGgtcatcctcatcCTGATTCTAGACTGATaaactgcaaaagGCTGA(X12)

TGCTGGTCATCCTCATCCTGATTCTAGACTGATAgACTGCAAAAGGCTGA(X1)

**ZFN(HR)**

TGCTGgtcatcctcatcCTGATTCTAGACTGATaaactgcaaaagGCTGA(X13)

**ZFN(NHEJ)**

TGCTGGTCATCCTCATCCTGAT AAACTGCAAAAGGCTGA (WT)

TGCTGGTCATCCTCATCCTGAT*TCTAGAT*AAACTGCAAAAGGCTGA(X1)

TGCTGGTCATCCTCATC*TAGA*CTGAT AAACTGCAAAAGGCTGA (X1)

TGCTGGTCATCCTCATCCTGAT*CTGAT*AAACTGCAAAAGGCTGA (X7)

TGCTGGTCATCCTCATCCTGAT*TGATA*AAACTGCAAAAGGCTGA (X1)

TGCTGGTCATCCTCA--*AGA*CTGAT AAACTGCAAAAGGCTGA (X1)

TGCTGGTCATCCTCATCCTGAT*AT* AAACTGCAAAAGGCTGA (X1)

TGCTGGTCATCCTCATC-TGAT AAACTGCAAAAGGCTGA (X1)

TGCTGGTCATCCTCATC----- AAACTGCAAAAGGCTGA (X1)

TGCTGGTCATCCTCATC----- ----TGCAAAAGGCTGA (X1)

TGCTGGTCATCTgCATC----- ----------AGGATGA (X1)

TGCTGGTCATCCT--------- ---------------GA (X1)

DNA sequences of gene-modified clones. PCR products corresponding to genomic modifications were cloned and sequenced. The ZFN or nickase target sequence is shown in blue letters and the *Xba*I site is shown in red letters. Mismatched bases are shown in lowercase letters, which may arise from PCR errors. Inserted bases are shown in italics. Dashes indicate deleted bases. The number of mutation occurrences is shown in parentheses. (WT) wild-type DNA sequence, (Donor) HR donor sequence.

**Supplemental Table 1. NHEJ frequency at on-target and off-target sites.**

| Chr. | Location | Gene | Empty vector | ZFN | | ZF nickase | |  | Ref. |
| --- | --- | --- | --- | --- | --- | --- | --- | --- | --- |
| indels (%) | indels (%) | *p*-value (ez) | indels (%) | *p*-value (en) | *p*-value (zn) |
| 3 | 46389548-46389576 | CCR5 | 0.020 | 20 | 0 | 0.019 | 0.62 | 0 | ([Pattanayak et al. 2011](#_ENREF_4))  ([Gabriel et al. 2011](#_ENREF_1)) |
| 3 | 46374209-46374237 | CCR2 | 0.000 | 8.6 | 0 | 0.010 | 8.2E-03 | 0 | ([Pattanayak et al. 2011](#_ENREF_4))  ([Gabriel et al. 2011](#_ENREF_1)) |
| 11 | 13441738-13441766 | BTBD10(promoter) | 0.0032 | 0.77 | 0 | 0.00051 | 0.98 | 0 | ([Pattanayak et al. 2011](#_ENREF_4)) |
| 4 | 104775175-104775203 | TACR3 | 0.0036 | 0.86 | 0 | 0.0028 | 0.76 | 0 | ([Pattanayak et al. 2011](#_ENREF_4)) |
| 6 | 52114315-52114343 |  | 0.012 | 0.17 | 0 | 0.011 | 0.62 | 0 | ([Pattanayak et al. 2011](#_ENREF_4)) |
| 8 | 73899370-73899398 | KCNB2 | 0.0013 | 0.043 | 0 | 0.00049 | 0.86 | 0 | ([Pattanayak et al. 2011](#_ENREF_4)) |
| 8 | 4865886-4865914 |  | 0.00029 | 0.016 | 0 | 0.00035 | 0.39 | 0 | ([Pattanayak et al. 2011](#_ENREF_4)) |
| 9 | 80584200-80584229 |  | 0.0011 | 0.011 | 1.3E-06 | 0.0026 | 0.029 | 4.3E-05 | ([Pattanayak et al. 2011](#_ENREF_4)) |
| 7 | 70557254-70557283 | WBSCR17 | 0.0073 | 0.063 | 0 | 0.0067 | 0.84 | 0 | ([Pattanayak et al. 2011](#_ENREF_4)) |
| 12 | 74249717-74249745 | KRR1 | 0.0055 | 4.7 | 0 | 0.016 | 0 | 0 | ([Gabriel et al. 2011](#_ENREF_1)) |
| 12 | 94236429-94236457 | VEZT | 0.0028 | 0.086 | 0 | 0.0057 | 4.7E-03 | 0 | ([Gabriel et al. 2011](#_ENREF_1)) |
| 11 | 66720356-66720384 | FBXL11 | 0.058 | 8.5 | 0 | 0.076 | 0.081 | 0 | ([Gabriel et al. 2011](#_ENREF_1)) |
| 16 | 86056713-86056741 | ZCCHC14 | 0.00091 | 0.68 | 0 | 0.00094 | 0.46 | 0 | ([Gabriel et al. 2011](#_ENREF_1)) |
| 1 | 88422165-88422203 | PKN2 | 0.030 | 0.023 | 0.73 | 0.000 | 1.0 | 1.8E-03 | ([Gabriel et al. 2011](#_ENREF_1)) |

NHEJ-mediated indel frequency is the percentage of sequences with indels among the total sequence reads. Total read numbers were 10623132 (empty vector), 11994300 (ZFN), and 16494524 (ZF nickases), and average read numbers per site were 758795 (empty vector), 856736 (ZFN), and 1178180 (nickase). Empty vector was used as a negative control. Indel frequency below 0.1% is likely caused by errors that occur during sequencing or PCR. *P*-values were calculated for a one-sided t-test: *p*-value (ez), empty vector vs. ZFN; *p*-value (en), empty vector vs. ZF nickase; *p*-value (zn), ZFN vs. ZF nickase.

**Supplemental Table 2. Deletion frequencies between the *CCR2* and *CCR5* loci.**

| Nuclease or nickase | Amount of genomic DNA (Copy number per half genome) | | | | | | | | | | Frequency (%) | |
| --- | --- | --- | --- | --- | --- | --- | --- | --- | --- | --- | --- | --- |
| 100 ng | 33 ng | 10 ng | 3.3 ng | 1 ng | 333 pg | 100 pg | 33 pg | 10 pg | 3.3 pg | Estimate | Upper and |
| (30000) | (10000) | (3000) | (1000) | (300) | (100) | (30) | (10) | (3) | (1) | lower limits |
| L_KK/R_EL | 1/1 | 1/1 | 1/1 | 1/1 | 1/1 | 17/17 | 15/17 | 10/17 | 2/16 | - | 7 | (5-9) |
| (ZFN-224) | 1/1 | 1/1 | 1/1 | 1/1 | 1/1 | 17/17 | 17/17 | 6/17 | 5/16 | - | 8 | (6-13) |
| L_KK/R_el | 15/17 | 6/17 | 4/17 | 1/17 | 0/1 | 0/1 | 0/1 | 0/1 | - | - | 0.006 | (0.004-0.009) |
|  | 1/1 | 15/17 | 5/17 | 2/17 | 1/17 | 0/1 | 0/1 | 0/1 | - | - | 0.02 | (0.01-0.03) |
| L_el/R_KK | 17/17 | 16/17 | 7/17 | 5/17 | 0/1 | 0/1 | 0/1 | 0/1 | - | - | 0.02 | (0.02-0.04) |
|  | 1/1 | 1/1 | 16/17 | 6/17 | 3/17 | 0/17 | 0/1 | 0/1 | - | - | 0.06 | (0.04-0.09) |

Genomic DNA samples were serially diluted and subjected to digital PCR analysis as described ([Lee et al. 2010](#_ENREF_3)). Sixteen to seventeen reactions were performed in parallel at each critical dilution point. Results are shown as the number of reactions that yielded positive PCR products per number of total reactions. Frequencies are calculated using the Extreme Limiting Dilution Analysis software ([Hu and Smyth 2009](#_ENREF_2)). Upper and lower limits indicate 95% confidence intervals. The results are obtained from two independent transfections.

**Supplemental Table 3. List of primers**

|  | Primer name | Sequence (5' to 3') |
| --- | --- | --- |
| FokI D450A mutation | D450A-F | GATCAAGGAAACCGGCCGGAGCAATTTATAC |
| D450A-R | GTATAAATTGCTCCGGCCGGTTTCCTTGATC |
| HR donor | C-HA-LF | GGAATTCCATATGAATTGTTGTCAAAGCTTCAT |
| C-HA-LR | CTAGTCTAGAATCAGGATGAGGATGACCAG |
| C-HA-RF | CTAGTCTAGACTGATAAACTGCAAAAGGCT |
| C-HA-RR | GCGGGAGCTCCAGAAGCGTTTGGCAATGTG |
| HR detection | HR-F1 | CTGGCTTGCTCATAGTGCATGT |
| HR-F2 | CATGTTCTTTGTGGGCTAACTC |
| HR-R | TCACAAGCCCACAGATATTT |
| T7E1 | CCR5-F | GAGCCAAGCTCTCCATCTAGT |
| CCR5-R | CTGTATGGAAAATGAGAGCTGC |
| Deep sequencing | 1-F1 | TTATGCACAGGGTGGAACAA |
| 1-F2 | ATACATCGGAGCCCTGCCAA |
| 1-R1 | AGCATAGTGAGCCCAGAAGG |
| 1-R2 | GGAAAAACAGGTCAGAGATGGC |
| 2-F1 | CGGTGCTCCCTGTCATAAAT |
| 2-F2 | TCCTGCCTCCGCTCTACTCG |
| 2-R1 | CTGGGACAGAAGCAAACACA |
| 2-R2 | ACCCCAAAGGTGACCGTCCT |
| 3-F | TCCCACGTTTTCCCCTTGAC |
| 3-R | GTCCCTCACGACGACCGACT |
| 4-F1 | GCCAATAGTTCTGGCAAAATG |
| 4-F2 | TTGGGGGAATGAGATTGGGA |
| 4-R1 | CTGTGCGAAAATCCAGCAAT |
| 4-R2 | GGAAAATCCAGCAAGGTGAAA |
| 5-F1 | TGCTCATGGCACACTACATAAA |
| 5-F2 | TCCTCCCGTTGAGGAAGCAC |
| 5-R1 | TCCTTTCCCTTGTCCTGAGA |
| 5-R2 | GCCTCAAAAGCATAAACAGCA |
| 6-F | CAGACCGCTGCTGCTGAGAC |
| 6-R | AGGGCGGACTCATTGCTTTG |
| 7-F | TGGGTTCCTCGGGTTCTCTG |
| 7-R | GAAACCAGAAGTTCACAACAATGCTT |
| 8-F | TGTTTTGGGTGCATGTGGGT |
| 8-R | TCCAGGGAGTGAGGTGAAGACA |
| 9-F | AGGATGCATTGTCCCCCAGA |
| 9-R | TGGAGTGACATGTATGAAGCCA |
| 10-F1 | TGGCCCACAGAGAGAGACACC |
| 10-F2 | AAATGAAAGCCAGGCAGATG |
| 10-R1 | GTCAGGCTAGTCTCGAAATCC |
| 10-R2 | CTAAGCCTCCCAAAGTGCTG |
| 11-F1 | ACTCAAACCAAGCAAACACTCC |
| 11-F2 | CAAGAAGCTTCCAGAGAGCAA |
| 11-R1 | AAATGGGGGGTTAAATGGGTCC |
| 11-R2 | TTAGCAATGTTGAGCCCCTGG |
| 12-F | TGCCACCTCCAGTTCTTCAT |
| 12-R | TCCCAGCTATGCAAGAGGTT |
| 13-F | ATCTAGGGGCACCTGGACTT |
| 13-R | TGGGAGCTGGTTAGAAATGC |
| 14-F | GCTCCTGGGCACGACTATTA |
| 14-R | CCACAAGCTCCATTTCCAGT |

**Supplementary References**

Gabriel R, Lombardo A, Arens A, Miller JC, Genovese P, Kaeppel C, Nowrouzi A, Bartholomae CC, Wang JB, Friedman G et al. 2011. An unbiased genome-wide analysis of zinc-finger nuclease specificity. *Nat Biotechnol* 29(9): 816-U872.

Hu YF, Smyth GK. 2009. ELDA: Extreme limiting dilution analysis for comparing depleted and enriched populations in stem cell and other assays. *J Immunol Methods* 347(1-2): 70-78.

Lee HJ, Kim E, Kim JS. 2010. Targeted chromosomal deletions in human cells using zinc finger nucleases. *Genome Res* 20(1): 81-89.

Pattanayak V, Ramirez CL, Joung JK, Liu DR. 2011. Revealing off-target cleavage specificities of zinc-finger nucleases by in vitro selection. *Nat Methods* 8(9): 765-U115.
